# Supplementary material
Source: MDPI journal article supplement (https://www.mdpi.com/2073-4395/12/2/386)
Supplement: s1 [file s1]

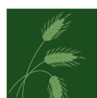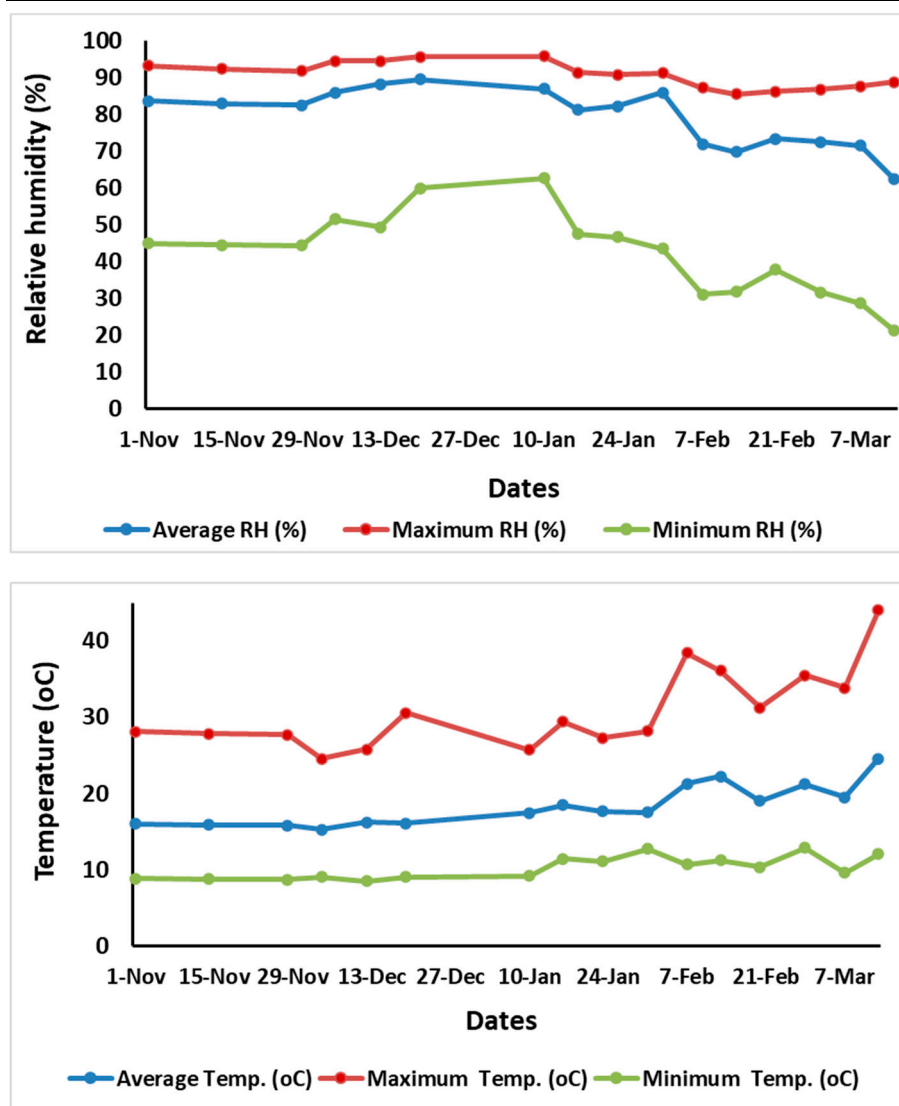

Figure S1. Average, minimum and maximum air relative humidity (RH) and temperature (°C) during the experiment (2014-2015).

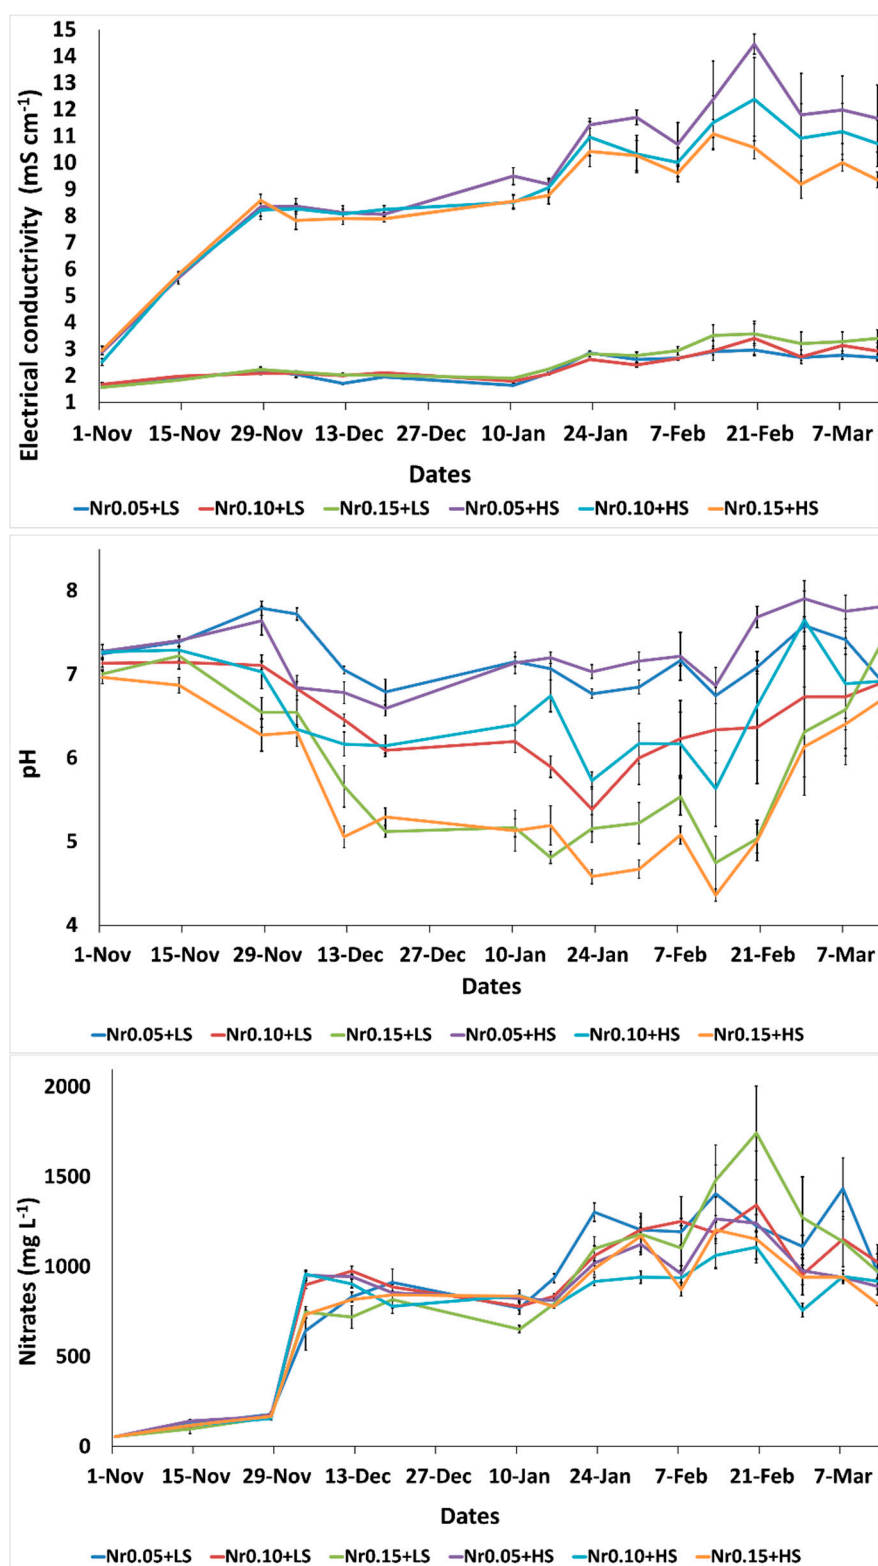

**Figure S2.** The effect of salinity (Sal) levels (LS: Low Salinity of 0 mM NaCl; HS: High Salinity of 50 mM NaCl) and  $\text{NH}_4/\text{N}_{\text{total}}$  ratios (Nr0.05, Nr0.10, and Nr0.15) application on the fluctuation of the electrical conductivity (EC;  $\text{mS cm}^{-1}$ ), pH and nitrates content of the drainage solution, during cultivation (2014-2015). The values refer to the mean ( $\pm$  SE), following statistical analysis according to Duncan's Multiple Test (MRT).
